# Supplementary material
Source: PubMed Central journal article supplement (PMC2583605)
Supplement: supp_190_23_7797__1.pdf [file supp_190_23_7797__1.pdf]

**Supplementary Material for:**

**Phenotypic and Transcriptomic Characterization of *Bacillus subtilis*  
Mutants with Grossly Altered Membrane Composition**

Letal I. Salzberg and John D. Helmann\*

Department of Microbiology, Cornell University, Ithaca, NY 14853-8101, USA

Figure S1. Analysis of lipid composition of WT and Q mutant strains by 2D TLC

Table S1: FAME analysis of *B. subtilis* and selected mutant strains

Table S2,S3, and S4: Annotated results of DNA microarray analyses

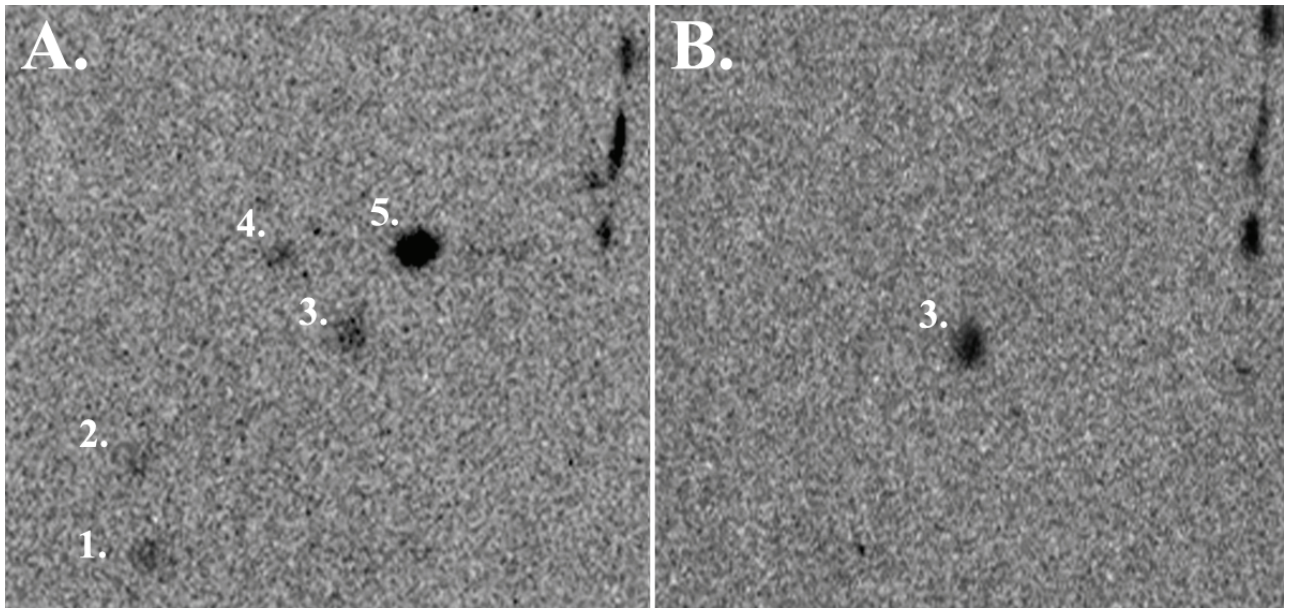

**FIG. S1. Two-dimensional TLC analysis of membrane mutants.** Cells of the wild-type (A) and the quadruple mutant (B) were grown in LB and labeled with 0.05  $\mu\text{Ci}$  of [2- $^{14}\text{C}$ ]acetic acid per ml for 4-5 hours. Lipids were extracted and separated by 2D-TLC first using the solvent mixture chloroform/methanol/water (65:25:4 v/v), and then using the solvent mixture chloroform/acetic acid/methanol/water (80:15:12:4 v/v). Spots were identified by comparison to lipid profiles of single mutants. 1: LPG, 2: unknown, 3: PG, 4: unknown, 5: PE.

Table S1. FAME analysis of *Bacillus subtilis* and isogenic mutant strains altered in membrane composition.

| Fatty Acid       | Percent of total |             |       |       |
|------------------|------------------|-------------|-------|-------|
|                  | Wild-Type        | <i>ugtP</i> | MPY   | UPMY  |
| 10:00            | 0.28             | 0.1         |       |       |
| 12:00            | 0.24             | 0.11        | 0.19  | 0.22  |
| 13:0 iso         | 0.2              | 0.1         | 0.18  | ----  |
| 13:0 anteiso     |                  | 0.07        |       |       |
| 14:0 iso         | 2.3              | 0.53        | 1.6   | 0.56  |
| 14:00            | 0.76             | 0.31        | 0.57  | 0.56  |
| 15:0 iso         | 19.46            | 14.54       | 20.48 | 16.73 |
| 15:0 anteiso     | 38.16            | 39.8        | 38.96 | 40.29 |
| 15:00            | 0.55             | 0.13        | 0.35  | 0.18  |
| 16:1 w7c alcohol | 0.24             |             |       |       |
| 16:0 iso         | 6.28             | 2.62        | 5.04  | 2.55  |
| 16:1 w11c        | 0.65             | 0.09        |       |       |
| 16:1 w5c         |                  | 0.08        |       |       |
| 16:00            | 6.32             | 3.47        | 5.13  | 4.63  |
| 17:1 iso w10c    | 0.52             | 0.15        |       |       |
| 17:0 iso         | 10.02            | 14.68       | 12.36 | 14.12 |
| 17:0 anteiso     | 11.32            | 21.19       | 13.51 | 18.12 |
| 17:00            | 0.22             | 0.09        | 0.14  |       |
| 18:0 iso         | 0.16             | 0.13        |       |       |
| 18:1 w9c         | 0.6              | 0.21        | 0.49  | 0.49  |
| 18:1 w7c         | 0.16             | 0.09        |       |       |
| 18:00            | 0.65             | 0.6         | 0.57  | 0.72  |
| 17:0 iso 3OH     |                  | 0.06        |       |       |
| 17:0 2OH         | 0.1              | 0.09        |       |       |
| 19:0 iso         |                  | 0.21        |       | 0.17  |
| 19:0 anteiso     |                  | 0.3         |       | 0.22  |
